# Supplementary material for: Fibrous and Spherical Aggregates of Ovotransferrin as Stabilizers for Oleogel-Based Pickering Emulsions: Preparation, Characteristics and Curcumin Delivery
Source: MDPI journal article supplement (doi:10.3390/gels8080517), 2022-08-19
Supplement: s1 [file s1]

Article

# Fibrous and Spherical Aggregates of Ovotransferrin as Stabilizers for Oleogel-Based Pickering Emulsions: Preparation, Characteristics and Curcumin Delivery

Qi Zhou <sup>1</sup>, Zihao Wei <sup>1,\*</sup>, Yanan Xu <sup>1</sup> and Changhu Xue <sup>1,2</sup>

<sup>1</sup> College of Food Science and Engineering, Ocean University of China, Qingdao 266003, China

<sup>2</sup> Qingdao National Laboratory for Marine Science and Technology, Qingdao 266235, China

\* Correspondence: weizihao@ouc.edu.cn

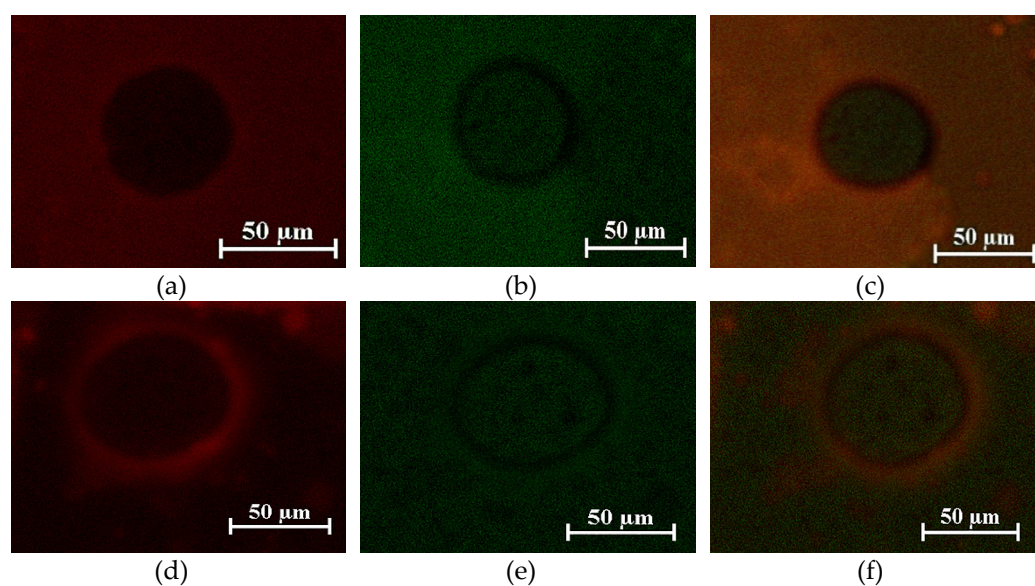

**Figure S1.** Confocal laser scanning micrographs of FIB-OPEs (a–c, corresponding to OVT fibrils, MCT, and their overlap, respectively) and the SPH-OPEs (d–f, corresponding to OVT spheres, MCT, and their overlap, respectively).
